# Supplementary material for: The DNA Copy Number of Human Endogenous Retrovirus-W (MSRV-Type) Is Increased in Multiple Sclerosis Patients and Is Influenced by Gender and Disease Severity
Source: PubMed Central journal article supplement (PMC3538585; doi:10.1371/journal.pone.0053623), 2013-01-07
Supplement: pone.0053623.s001.pdf [file pone.0053623.s001.pdf]

# Quantitation Report

## Experiment Information

|                         |                                      |
|-------------------------|--------------------------------------|
| Run Name                | Standard Curves on Genomic DNA_MS RV |
| Run Start               | 04/07/2012 11:46:34                  |
| Run Finish              | 04/07/2012 13:28:58                  |
| Operator                | Marta García-Montojo                 |
| Notes                   | Standard Curve on genomic DNA_MS RV  |
| Run On Software Version | Rotor-Gene 6.1.93                    |
| Run Signature           | The Run Signature is valid.          |
| Gain FAM                | 5,                                   |

## Quantitation Information

|                               |                                            |
|-------------------------------|--------------------------------------------|
| Threshold                     | 0,024                                      |
| Left Threshold                | 1,000                                      |
| Standard Curve Imported       | No                                         |
| Standard Curve (1)            | conc= 10 <sup>^</sup> (-0,309*CT + 10,286) |
| Standard Curve (2)            | CT = -3,241*log(conc) + 33,341             |
| Reaction efficiency (*)       | 1,03471 (* = 10 <sup>^</sup> (-1/m) - 1)   |
| M                             | -3,24148                                   |
| B                             | 33,34084                                   |
| R Value                       | 0,99786                                    |
| R <sup>2</sup> Value          | 0,99573                                    |
| Start normalising from cycle  | 1                                          |
| Noise Slope Correction        | No                                         |
| No Template Control Threshold | 0%                                         |
| Reaction Efficiency Threshold | Disabled                                   |
| Normalisation Method          | Dynamic Tube Normalisation                 |
| Digital Filter                | Light                                      |
| Sample Page                   | Page 1                                     |
| Imported Analysis Settings    |                                            |

## Messages

### Message

## Profile

| Cycle                      | Cycle Point                                              |
|----------------------------|----------------------------------------------------------|
| Hold @ 95°C, 15 min 0 secs |                                                          |
| Cycling (40 repeats)       | Step 1 @ 95°C, hold 15 secs                              |
|                            | Step 2 @ 60°C, hold 60 secs, acquiring to Cycling A(FAM) |

## Raw Data For Cycling A.FAM

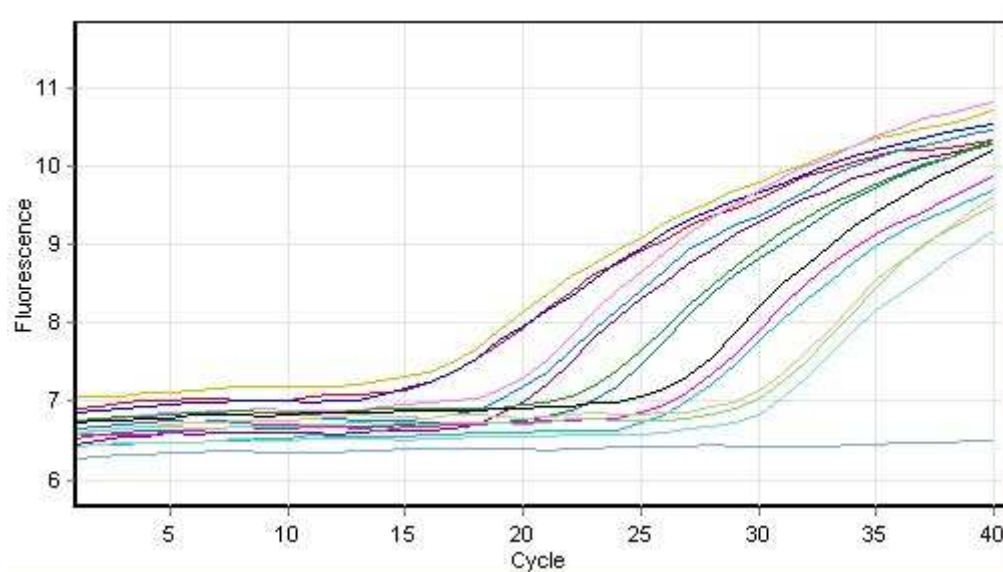

## Quantitation data for Cycling A.FAM

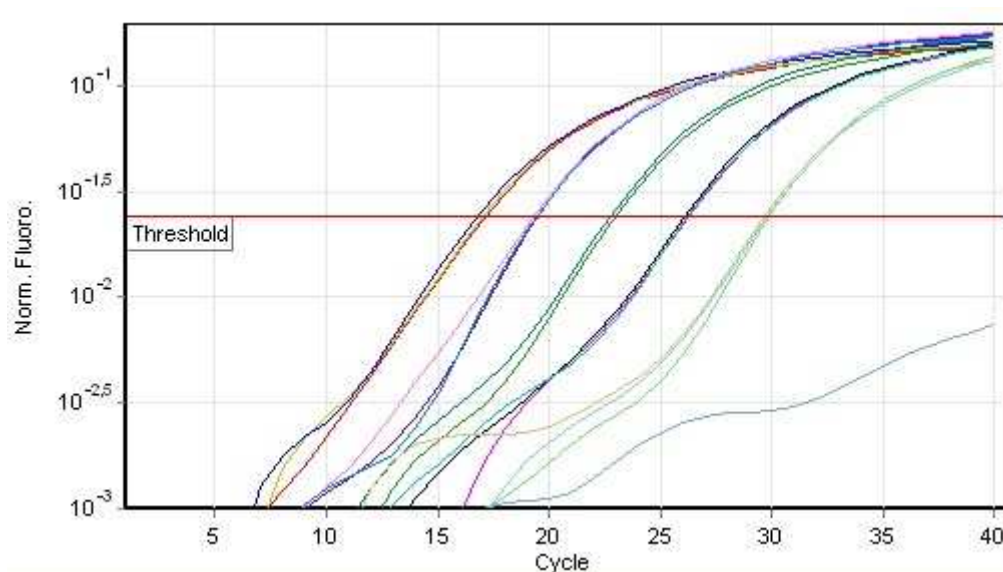

## Standard Curve

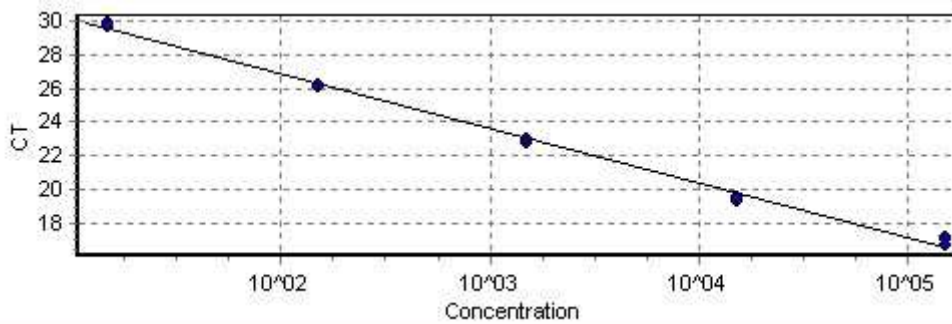

| No | Color       | Name               | Type             | Ct    | Given Conc (Copies) | Calc Conc (Copies) | % Var  |
|----|-------------|--------------------|------------------|-------|---------------------|--------------------|--------|
| A1 | Red         | Gen DNA 5e5 pg MSR | Standard         | 17,11 | 151.151,0000        | 101.999,6854       | 32,5 % |
| A2 | Yellow      | Gen DNA 5e5 pg MSR | Standard         | 16,99 | 151.151,0000        | 111.092,1604       | 26,5 % |
| A3 | Blue        | Gen DNA 5e5 pg MSR | Standard         | 16,72 | 151.151,0000        | 133.914,8933       | 11,4 % |
| A4 | Purple      | Gen DNA 5e4pg MSR  | Standard         | 19,48 | 15.151,0000         | 18.947,6467        | 25,1 % |
| A5 | Pink        | Gen DNA 5e4pg MSR  | Standard         | 19,31 | 15.151,0000         | 21.364,5620        | 41,0 % |
| A6 | Light Blue  | Gen DNA 5e4pg MSR  | Standard         | 19,44 | 15.151,0000         | 19.483,7264        | 28,6 % |
| A7 | Teal        | Gen DNA 5e3 pg MSR | Standard         | 22,74 | 1.515,0000          | 1.866,9435         | 23,2 % |
| B1 | Green       | Gen DNA 5e3 pg MSR | Standard         | 22,93 | 1.515,0000          | 1.632,1140         | 7,7%   |
| B2 | Magenta     | Gen DNA 5e2 pg MSR | Standard         | 26,22 | 151,0000            | 157,5848           | 4,4%   |
| B3 | Black       | Gen DNA 5e2 pg MSR | Standard         | 26,06 | 151,0000            | 176,7868           | 17,1 % |
| B4 | Cyan        | Gen DNA 5e2 pg MSR | Standard         | 26,19 | 151,0000            | 160,8149           | 6,5%   |
| B5 | Gold        | Gen DNA 5e1 pg MSR | Standard         | 29,68 | 15,0000             | 13,4598            | 10,3 % |
| B6 | Light Green | Gen DNA 5e1 pg MSR | Standard         | 29,87 | 15,0000             | 11,7370            | 21,8 % |
| B7 | Light Cyan  | Gen DNA 5e1 pg MSR | Standard         | 29,80 | 15,0000             | 12,4105            | 17,3 % |
| B8 | Blue-Gray   | Neg Control        | Negative Control |       |                     |                    |        |

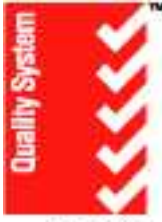

**Quality  
Endorsed  
Company**  
ISO 9001 Lic 21313  
SAI Global

This report generated by Rotor-Gene Real-Time Analysis Software 6.1 (Build 93)  
©Corbett Research 2005  
©All Rights Reserved  
ISO 9001:2000 (Reg. No. QEC21313)
