# Supplementary material for: The DNA Copy Number of Human Endogenous Retrovirus-W (MSRV-Type) Is Increased in Multiple Sclerosis Patients and Is Influenced by Gender and Disease Severity
Source: PubMed Central journal article supplement (PMC3538585; doi:10.1371/journal.pone.0053623), 2013-01-07
Supplement: pone.0053623.s002.pdf [file pone.0053623.s002.pdf]

# Quantitation Report

## Experiment Information

|                         |                                       |
|-------------------------|---------------------------------------|
| Run Name                | Standard Curves on Genomic RNase P    |
| Run Start               | 04/07/2012 11:46:34                   |
| Run Finish              | 04/07/2012 13:28:58                   |
| Operator                | Marta García-Montojo                  |
| Notes                   | Standard Curve on genomic DNA_RNase P |
| Run On Software Version | Rotor-Gene 6.1.93                     |
| Run Signature           | The Run Signature is valid.           |
| Gain FAM                | 5,                                    |

## Quantitation Information

|                               |                                           |
|-------------------------------|-------------------------------------------|
| Threshold                     | 0,024                                     |
| Left Threshold                | 1,000                                     |
| Standard Curve Imported       | No                                        |
| Standard Curve (1)            | conc= 10 <sup>^(-0,294*CT + 10,195)</sup> |
| Standard Curve (2)            | CT = -3,406*log(conc) + 34,724            |
| Reaction efficiency (*)       | 0,96604 (* = 10 <sup>^(-1/m) - 1</sup> )  |
| M                             | -3,4061                                   |
| B                             | 34,72396                                  |
| R Value                       | 0,99975                                   |
| R^2 Value                     | 0,9995                                    |
| Start normalising from cycle  | 1                                         |
| Noise Slope Correction        | No                                        |
| No Template Control Threshold | 0%                                        |
| Reaction Efficiency Threshold | Disabled                                  |
| Normalisation Method          | Dynamic Tube Normalisation                |
| Digital Filter                | Light                                     |
| Sample Page                   | Page 1                                    |
| Imported Analysis Settings    |                                           |

## Messages

### Message

## Profile

| Cycle                      | Cycle Point                                              |
|----------------------------|----------------------------------------------------------|
| Hold @ 95°C, 15 min 0 secs |                                                          |
| Cycling (40 repeats)       | Step 1 @ 95°C, hold 15 secs                              |
|                            | Step 2 @ 60°C, hold 60 secs, acquiring to Cycling A(FAM) |

## Raw Data For Cycling A.FAM

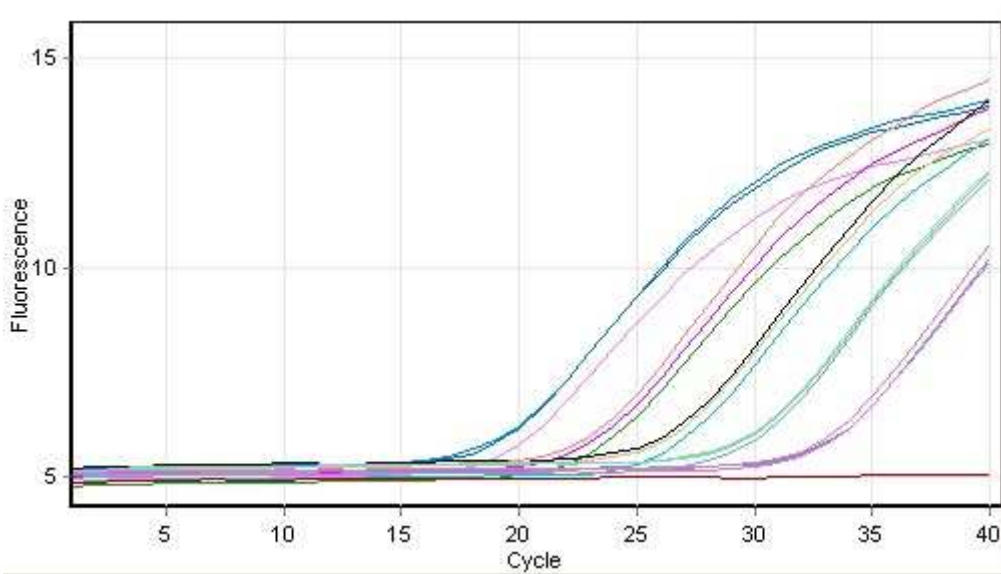

## Quantitation data for Cycling A.FAM

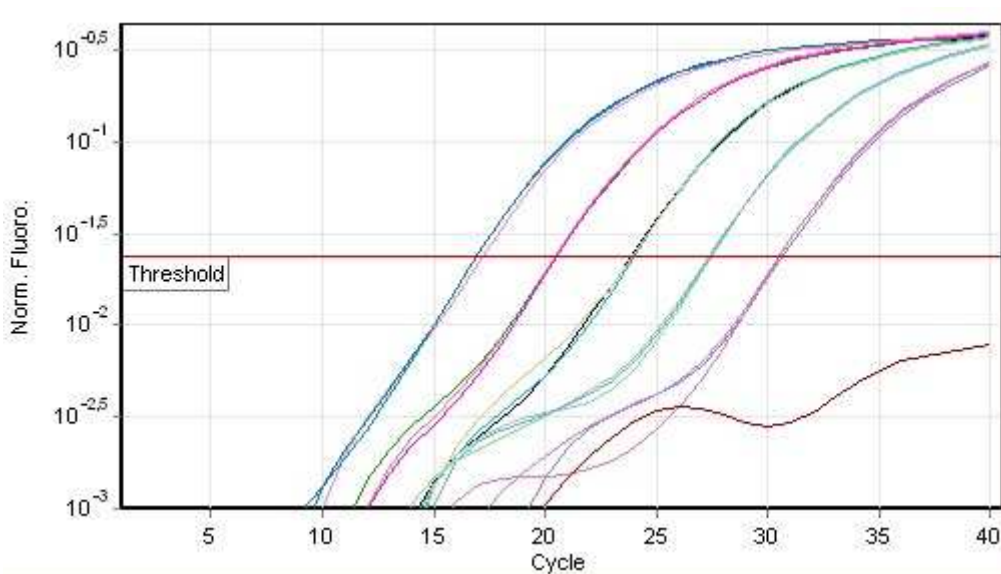

## Standard Curve

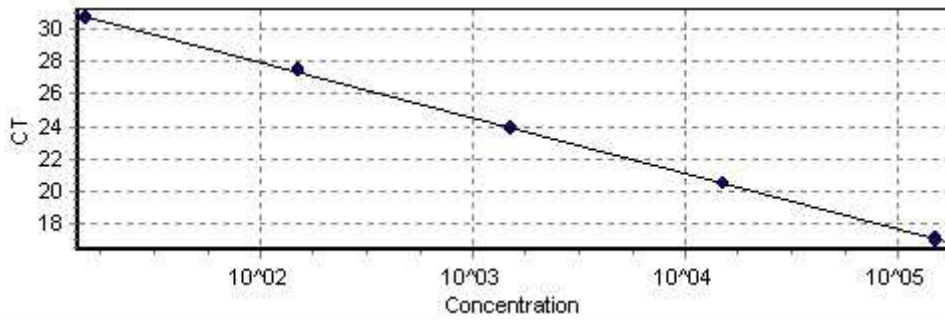

| No | Color | Name                   | Type             | Ct    | Given Conc (Copies) | Calc Conc (Copies) | % Var |
|----|-------|------------------------|------------------|-------|---------------------|--------------------|-------|
| E5 | ■     | Gen DNA 5e5 pg RNase P | Standard         | 17,21 | 151.151,0000        | 138.851,3290       | 8,1%  |
| E6 | ■     | Gen DNA 5e5 pg RNase P | Standard         | 16,93 | 151.151,0000        | 167.212,1940       | 10,6% |
| E7 | ■     | Gen DNA 5e5 pg RNase P | Standard         | 16,93 | 151.151,0000        | 168.021,3672       | 11,2% |
| E8 | ■     | Gen DNA 5e4 pg RNase P | Standard         | 20,48 | 15.151,0000         | 15.228,9826        | 0,5%  |
| F1 | ■     | Gen DNA 5e4 pg RNase P | Standard         | 20,54 | 15.151,0000         | 14.646,1550        | 3,3%  |
| F2 | ■     | Gen DNA 5e4 pg RNase P | Standard         | 20,53 | 15.151,0000         | 14.669,7422        | 3,2%  |
| F3 | ■     | Gen DNA 5e3 pg RNase P | Standard         | 23,85 | 1.515,0000          | 1.554,8648         | 2,6%  |
| F4 | ■     | Gen DNA 5e3 pg RNase P | Standard         | 23,97 | 1.515,0000          | 1.436,9732         | 5,2%  |
| F5 | ■     | Gen DNA 5e3 pg RNase P | Standard         | 23,89 | 1.515,0000          | 1.513,5152         | 0,1%  |
| F6 | ■     | Gen DNA 5e2 pg RNase P | Standard         | 27,38 | 151,0000            | 143,4453           | 5,0%  |
| F7 | ■     | Gen DNA 5e2 pg RNase P | Standard         | 27,48 | 151,0000            | 133,8553           | 11,4% |
| F8 | ■     | Gen DNA 5e2 pg RNase P | Standard         | 27,41 | 151,0000            | 139,9117           | 7,3%  |
| G1 | ■     | Gen DNA 5e1 pg RNase P | Standard         | 30,71 | 15,0000             | 15,0943            | 0,6%  |
| G2 | ■     | Gen DNA 5e1 pg RNase P | Standard         | 30,55 | 15,0000             | 16,7653            | 11,8% |
| G3 | ■     | Gen DNA 5e1 pg RNase P | Standard         | 30,57 | 15,0000             | 16,5376            | 10,3% |
| G4 | ■     | Neg Control            | Negative Control |       |                     |                    |       |

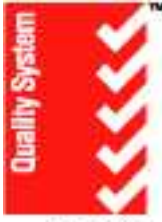

**Quality  
Endorsed  
Company**  
ISO 9001 Lic 21313  
SAI Global

This report generated by Rotor-Gene Real-Time Analysis Software 6.1 (Build 93)  
©Corbett Research 2005  
©All Rights Reserved  
ISO 9001:2000 (Reg. No. QEC21313)
