# Supplementary material for: The DNA Copy Number of Human Endogenous Retrovirus-W (MSRV-Type) Is Increased in Multiple Sclerosis Patients and Is Influenced by Gender and Disease Severity
Source: PubMed Central journal article supplement (PMC3538585; doi:10.1371/journal.pone.0053623), 2013-01-07
Supplement: pone.0053623.s003.pdf [file pone.0053623.s003.pdf]

# Quantitation Report

## Experiment Information

|                         |                              |
|-------------------------|------------------------------|
| Run Name                | Plate 1                      |
| Run Start               | 14/06/2011 13:10:26          |
| Run Finish              | 14/06/2011 14:55:38          |
| Operator                | Marta García-Montojo         |
| Notes                   | Standard Curve MSR V plasmid |
| Run On Software Version | Rotor-Gene 6.1.93            |
| Run Signature           | The Run Signature is valid.  |
| Gain FAM                | 5,                           |

## Quantitation Information

|                               |                                            |
|-------------------------------|--------------------------------------------|
| Threshold                     | 0,024                                      |
| Left Threshold                | 1,000                                      |
| Standard Curve Imported       | No                                         |
| Standard Curve (1)            | conc= 10 <sup>^</sup> (-0,310*CT + 12,785) |
| Standard Curve (2)            | CT = -3,230*log(conc) + 41,294             |
| Reaction efficiency (*)       | 1,03994 (* = 10 <sup>^</sup> (-1/m) - 1)   |
| M                             | -3,2298                                    |
| B                             | 41,29422                                   |
| R Value                       | 0,99836                                    |
| R <sup>2</sup> Value          | 0,99673                                    |
| Start normalising from cycle  | 1                                          |
| Noise Slope Correction        | No                                         |
| No Template Control Threshold | 0%                                         |
| Reaction Efficiency Threshold | Disabled                                   |
| Normalisation Method          | Dynamic Tube Normalisation                 |
| Digital Filter                | Light                                      |
| Sample Page                   | Page 1                                     |
| Imported Analysis Settings    |                                            |

## Messages

Message

## Profile

Cycle

Cycle Point

|                             |                                                          |
|-----------------------------|----------------------------------------------------------|
| Hold @ 95°C, 15 min 0 se cs |                                                          |
| Cycling (40 repeats)        | Step 1 @ 95°C, hold 15 secs                              |
|                             | Step 2 @ 60°C, hold 60 secs, acquiring to Cycling A(FAM) |

### Raw Data For Cycling A.FAM

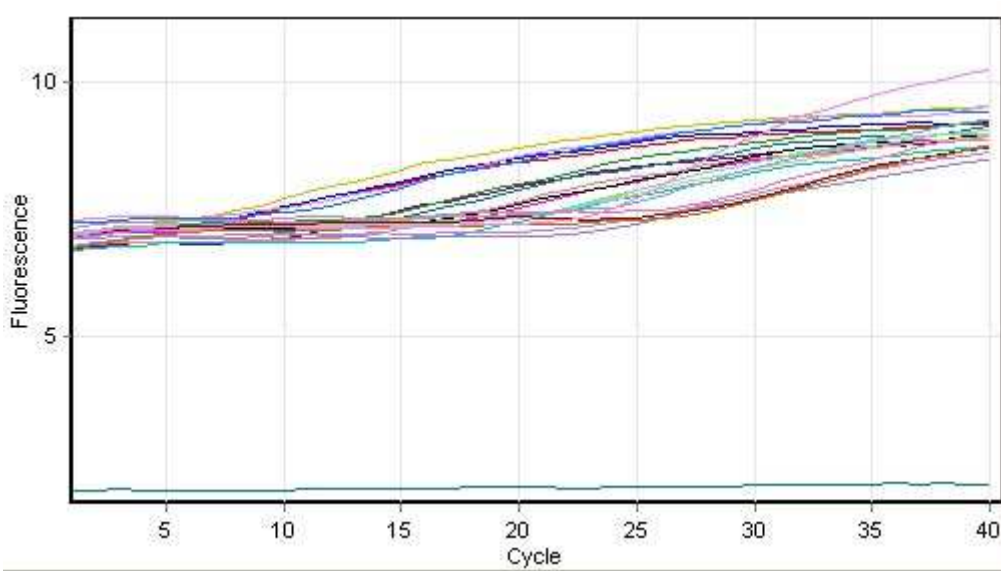

### Quantitation data for Cycling A.FAM

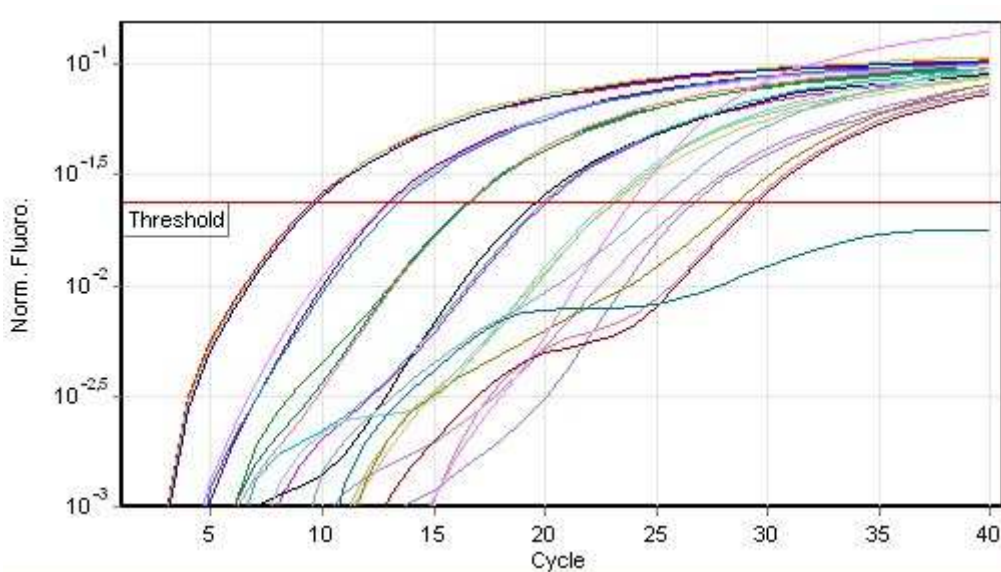

### Standard Curve

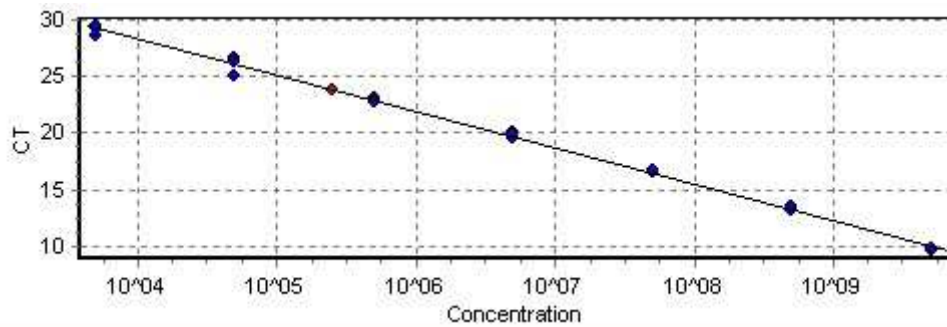

| No | Colour       | Name      | Type     | Ct    | Given Conc (Copies) | Calc Conc (Copies) |
|----|--------------|-----------|----------|-------|---------------------|--------------------|
| A1 | Red          | MSRV 10e9 | Standard | 9,58  | 5.000.000.000,0000  | 6.589.952.220,2125 |
| A2 | Yellow       | MSRV 10e9 | Standard | 9,73  | 5.000.000.000,0000  | 5.921.763.119,3230 |
| A3 | Blue         | MSRV 10e9 | Standard | 9,76  | 5.000.000.000,0000  | 5.802.390.937,2535 |
| A4 | Purple       | MSRV 10e8 | Standard | 13,07 | 500.000.000,0000    | 549.425.493,2024   |
| A5 | Pink         | MSRV 10e8 | Standard | 13,16 | 500.000.000,0000    | 513.367.838,5819   |
| A6 | Light Blue   | MSRV 10e8 | Standard | 13,49 | 500.000.000,0000    | 404.807.113,4418   |
| A7 | Teal         | MSRV 10e7 | Standard | 16,51 | 50.000.000,0000     | 47.308.417,2416    |
| A8 | Light Red    | MSRV 10e7 | Standard | 16,59 | 50.000.000,0000     | 44.618.173,6936    |
| B1 | Green        | MSRV 10e7 | Standard | 16,62 | 50.000.000,0000     | 43.607.605,4318    |
| B2 | Magenta      | MSRV 10e6 | Standard | 20,11 | 5.000.000,0000      | 3.629.541,5851     |
| B3 | Black        | MSRV 10e6 | Standard | 19,64 | 5.000.000,0000      | 5.070.391,7037     |
| B4 | Cyan         | MSRV 10e6 | Standard | 19,97 | 5.000.000,0000      | 4.011.760,4879     |
| B5 | Olive        | MSRV 10e5 | Standard | 23,15 | 500.000,0000        | 414.916,7917       |
| B6 | Light Green  | MSRV 10e5 | Standard | 23,02 | 500.000,0000        | 456.281,8776       |
| B7 | Light Cyan   | MSRV 10e5 | Standard | 22,81 | 500.000,0000        | 527.082,4269       |
| B8 | Light Blue   | MSRV 10e4 | Standard | 25,07 | 50.000,0000         | 105.487,0147       |
| C1 | Light Purple | MSRV 10e4 | Standard | 26,72 | 50.000,0000         | 32.598,1100        |
| C2 | Light Purple | MSRV 10e4 | Standard | 26,37 | 50.000,0000         | 41.905,3019        |
| C3 | Pink         | MSRV 10e3 | Standard | 29,31 | 5.000,0000          | 5.144,3720         |
| C4 | Red          | MSRV 10e3 | Standard | 29,5  | 5.000,0000          | 4.400,7634         |

| No | Colour                                                                            | Name             | Type             | Ct    | Given Conc (Copies) | Calc Conc (Copies) |
|----|-----------------------------------------------------------------------------------|------------------|------------------|-------|---------------------|--------------------|
|    |                                                                                   |                  |                  | 3     |                     |                    |
| C5 |  | MSRV 10e3        | Standard         | 28,63 | 5.000,0000          | 8.337,0024         |
| E5 |  | I.S MSRV         | Unknown          | 23,85 |                     | 251.504,0084       |
| E7 |  | Neg Control MSRV | Negative Control |       |                     |                    |

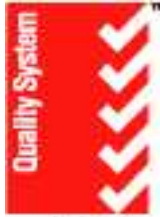

**Quality  
Endorsed  
Company**  
ISO 9001 Lic 21313  
SAI Global

This report generated by Rotor-Gene Real-Time Analysis Software 6.1 (Build 93)  
 ©Corbett Research 2005  
 All Rights Reserved  
 ISO 9001:2000 (Reg. No. QEC21313)
